# Supplementary material for: The conquest of the dark spaces: An experimental approach to lighting systems in Paleolithic caves
Source: PLOS journal article supplement (doi:10.1371/journal.pone.0250497), 2021-06-16
Supplement: S3 (10.1371/journal.pone.0250497.s003) [file journal.pone.0250497.s003]

### **S3 Appendix: Measured tools data**

The lux meter used in the experiments was a model PCE-L335. Its technical specifications are as follows (information is taken from pce-iberica.es) (Table 1):

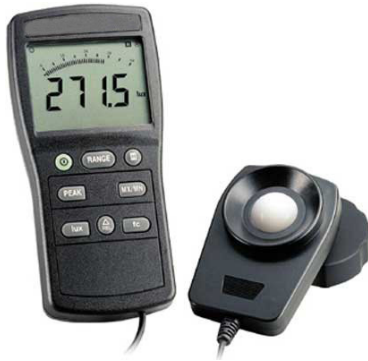

|                               |                                                                     |
|-------------------------------|---------------------------------------------------------------------|
| Ranges                        | 40/400/4.000/40.000/400.000 lux<br>240/400/4.000/40.000 foot-candle |
| Resolution                    | 0.01 lux<br>0.1 foot candle                                         |
| Accuracy                      | ± 3 %                                                               |
| Overcome indicator            | OL = Overload                                                       |
| CIE photopic f <sup>'</sup> 1 | < 9 %                                                               |
| Light sensor                  | silicon photodiode                                                  |
| Temperature characteristic    | ± 0,1 %/°C                                                          |
| Ambient condition             | 0...50°C/ < 80 % H.r.                                               |
| Screen                        | LCD 3½ positions                                                    |
| Alimentation                  | Six battery micro AAA                                               |
| Dimensions                    | Light sensor: 100 x 60 x 27 mm<br>Apparatus: 135 x 72 x 33 mm       |
| Weight                        | 250 g                                                               |
| Regulation                    | CNS 5199 II                                                         |

**Table 1. Specification techniques of PCE-L335 lux meter  
(information is taken from pce-iberica.es)**

The infrared thermometer used to measure the temperature was a model PCE-778. Its technical specifications are as follows (PCE Instruments website) (Table 2).

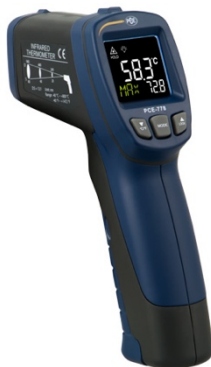

|                      |                                                                                                                                                                         |
|----------------------|-------------------------------------------------------------------------------------------------------------------------------------------------------------------------|
| Optical resolution   | 12: 1                                                                                                                                                                   |
| Measuring range      | -40... 800°C/-40... 1472°F                                                                                                                                              |
| Measurement accuracy | Measuring range -40... 0°C/-40... 32°F: ± 4°C/7.2°F<br>Measuring range 0... 400°C/32... 752°F: ± 1.5°C/2.7°F<br>Measuring range 400... 800°C/752... 1472°F: ± 2°C/3.6°F |
| Resolution           | 0.1°C/0.18°F at 0... 199.9°C/32... 391.8°F<br>1°C/1.8°F at > 199.9°C/391.8°F                                                                                            |
| Emissivity           | 0.1... 1 (adjustable)                                                                                                                                                   |
| Spectral             | 8... 14 µm                                                                                                                                                              |
| Polarity             | No indication: positive polarity<br>Display "-": negative polarity                                                                                                      |
| Automatic shutdown   | After 30 seconds of inactivity                                                                                                                                          |
| Operating conditions | 0... 50°C/32... 122°F, rH: 10... 90 %                                                                                                                                   |
| Storage conditions   | -20... 60°C/-4... 140°F, rH <80 %                                                                                                                                       |
| Power supply         | 9 V block battery                                                                                                                                                       |
| Laser                | 2nd grade                                                                                                                                                               |
| Weight               | 250 g/< 1 lb                                                                                                                                                            |
| Dimensions           | 95 x 83 x 192 mm/3.7 x 3.3 x 7.6 in                                                                                                                                     |

**Table 2: Specification techniques of the PCE-778 infrared thermometer (taken from pce-instruments.com)**
